# Supplementary material for: Identification of a substrate domain that determines system specificity in mycobacterial type VII secretion systems
Source: PubMed Central journal article supplement (PMC5311947; doi:10.1038/srep42704), 2017-02-16
Supplement: srep42704-s1.pdf [file srep42704-s1.pdf]

1 **Identification of a substrate domain that determines system specificity in mycobacterial type VII**  
2 **secretion systems**

3

4 Trang H. Phan<sup>1</sup>, Roy Ummels<sup>2</sup>, Wilbert Bitter<sup>1,2</sup>, Edith N.G. Houben<sup>1\*</sup>

5 <sup>1</sup>Section Molecular Microbiology, Amsterdam Institute of Molecules, Medicines & Systems, Vrije  
6 Universiteit Amsterdam, Amsterdam, The Netherlands

7 <sup>2</sup>Department of Medical Microbiology and Infection Control, VU University Medical Center, Amsterdam,  
8 The Netherlands

9

10 \* Corresponding author. Email: e.n.g.houben@vu.nl

11

12

13



1  
2  
3  
4  
5  
6  
7  
8  
9  
10  
11  
12  
13  
14  
15  
16  
17  
18  
19  
20  
21  
22  
23  
24  
25  
26  
27  
28  
29  
30  
31  
32

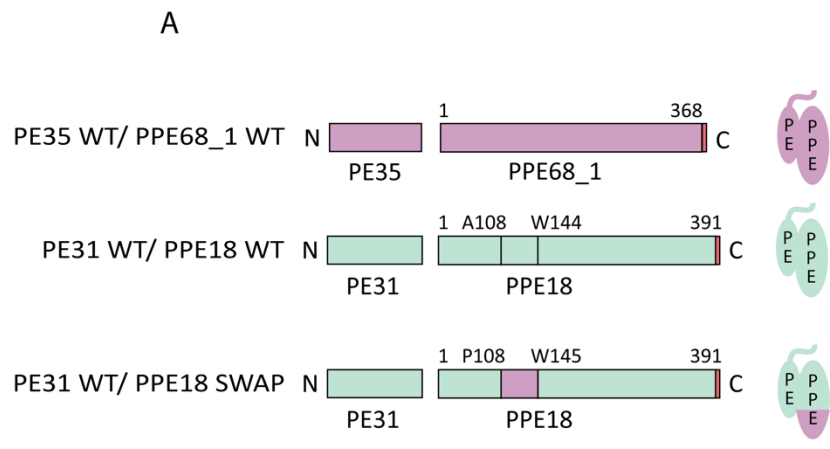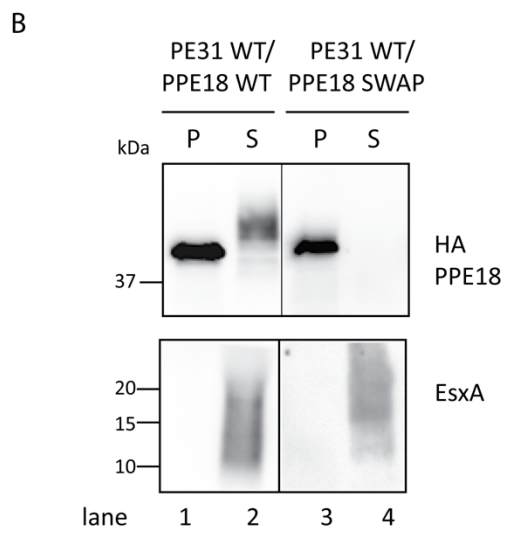

**Figure S2: PPE18 containing the predicted EspG<sub>1</sub> binding domain of PPE68\_1 is not secreted in the *M. marinum* WT strain.** **A**, Schematic representation of the WT *M. marinum* ESX-5 substrates PE31/PPE18 WT (in cyan), the WT *M. marinum* ESX-1 substrates PE35/PPE68\_1 (in pink). The predicted EspG<sub>1</sub> binding region of PPE68\_1 (P108-W145) was introduced into the corresponding region of PPE18 (A108-W144), resulting in PPE18 SWAP. **B**, Immunoblot analysis of PPE18 WT and PPE18\_SWAP secretion by overexpression of *ppe18* and *ppe18 swap* on the episomal plasmid pSMT3 under the control of the *hsp60* promoter. P=bacterial pellet, S=culture filtrate.

1  
2  
3  
4  
5  
6  
7  
8  
9  
10  
11  
12  
13  
14  
15  
16  
17  
18  
19  
20  
21  
22  
23  
24  
25  
26  
27  
28  
29  
30  
31

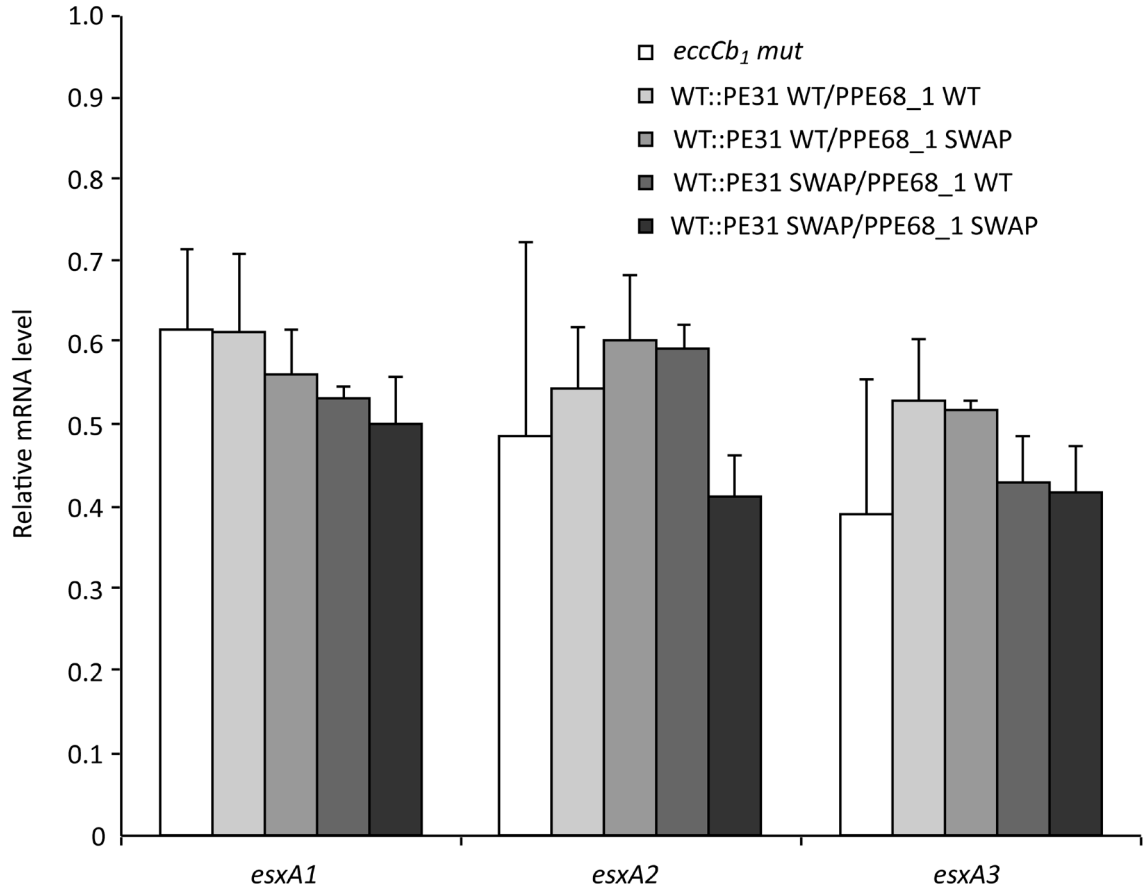

**Figure S3: Effect of different PE35/PPE68\_1 hybrid constructs on the transcript level of *esxA*.** Total RNA was isolated from WT *M. marinum* M<sup>USA</sup>, *eccCb1* mutant strain, and M<sup>USA</sup> strains exogenously expressing PE35 WT/PPE68\_1 WT, PE35 WT/PPE68\_1 SWAP, PE35 SWAP/PPE68\_1 WT, PE35 SWAP/PPE68\_1 SWAP. Three different sets of primers, including *esxA1*, *esxA2* and *esxA3*, were used to amplify *esxA* cDNA. Ct values were normalized for Ct values of the household gene *sigA* and compared to Ct values of *esxA* obtained from WT M<sup>USA</sup>.

1  
2  
3  
4  
5  
6  
7  
8  
9  
10  
11  
12  
13  
14  
15  
16  
17  
18  
19  
20  
21  
22  
23  
24  
25  
26  
27  
28

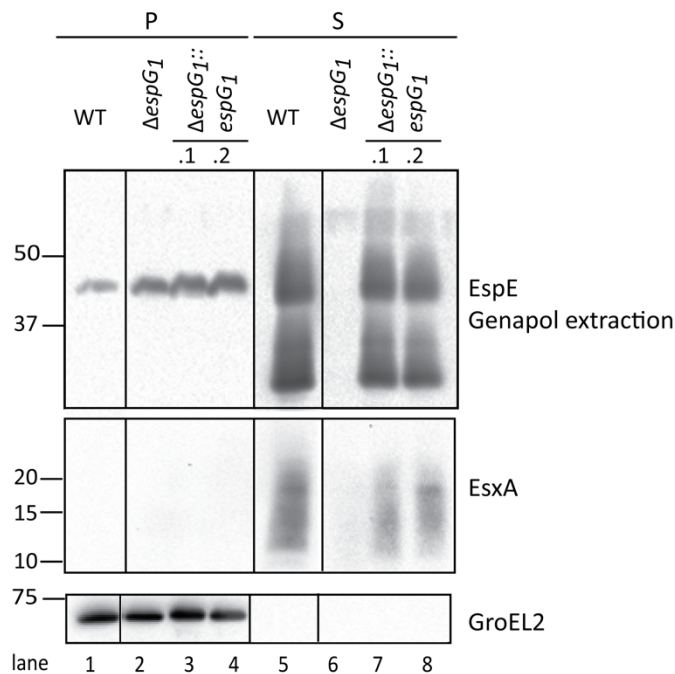

**Figure S4: Effect of *espG<sub>1</sub>* knockout and its complementation on the secretion of ESX-1 substrates.** Secretion analysis in the  $\Delta espG_1$  strain and corresponding complemented variant harboring the complete region of *espH-espG<sub>1</sub>-eccA<sub>1</sub>* on an integrative plasmid pMV under the control of the *hsp60* promoter. P=bacterial cell lysates, S=culture filtrate. Surface localization of the secreted EspE was restored upon an introduction of *espG<sub>1</sub>* as it was found in the Genapol X-080 cell extraction, whereas EsxA was re-secreted into the cultural supernatant. GroEL2 was included as the cytosolic and supernatant control. 0.2 OD unit of Genapol pellet and 0.5 OD unit of Genapol and culture supernatant were loaded. P=bacterial cell lysates, S=culture filtrate.

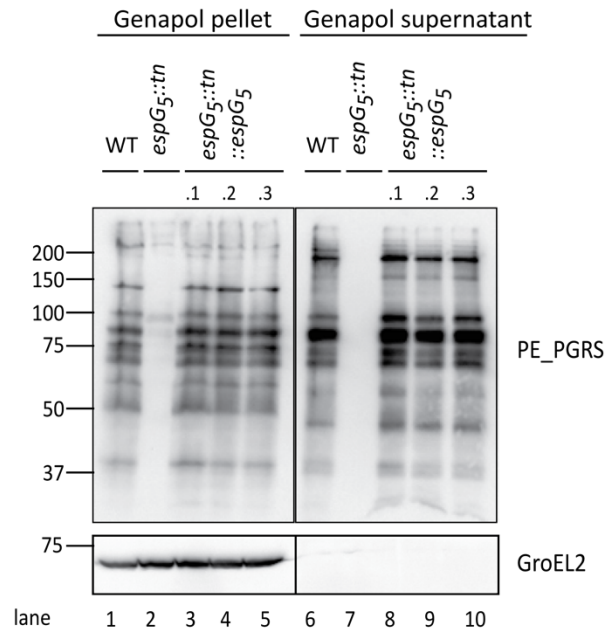

**Figure S5: Restoration of PE\_PGRS protein secretion by complementing the *espG5* transposon mutant strain.** *eccCb1* mut/*espG5::tn* was complemented with the integrative pMV plasmid containing the *esxM-esxN-espG5* gene cluster and a streptomycin resistance gene. Fractions enriched for cell-surface proteins of M<sup>USA</sup>, *eccCb1* mut/*espG5::tn* and complemented variant were isolated by the Genapol X-080 extraction and analyzed by western blot analysis. PE\_PGRS signals were found in the pellet of *espG5::tn* strain upon the complementation of *espG5* and its cell-surface localization was restored. GroEL2 was included as loading control. 0.2 OD unit of Genapol pellet and 0.5 OD unit of Genapol supernatant were loaded.

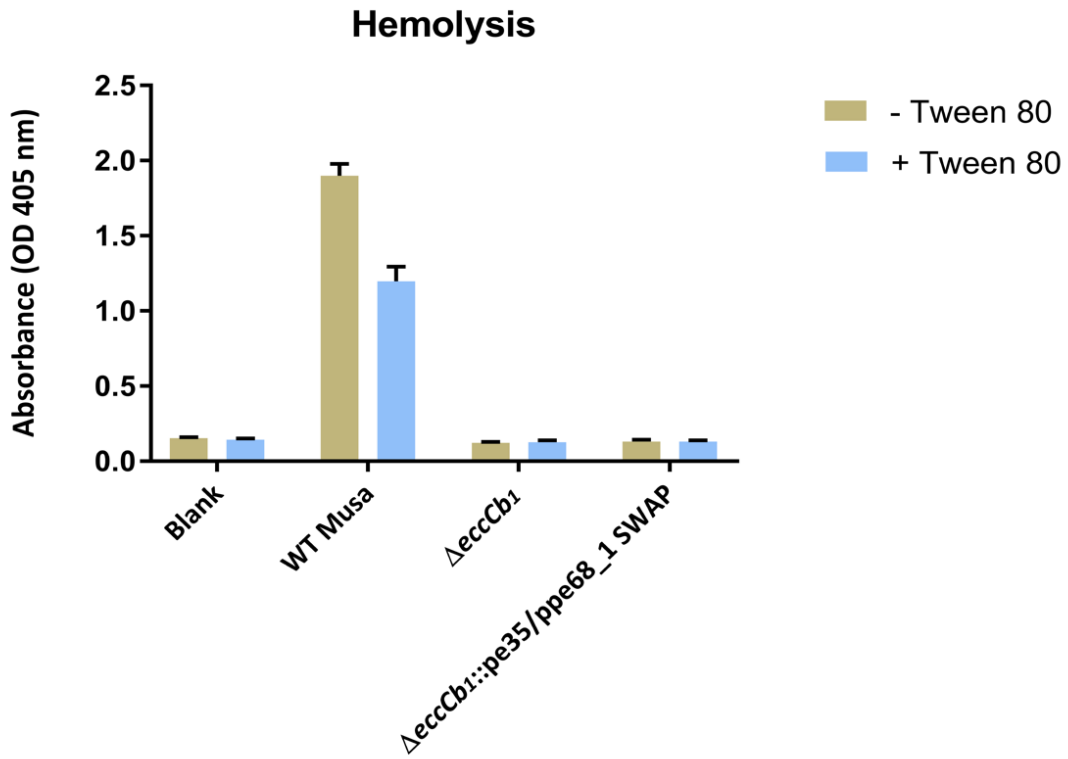

14 **Figure S6: PPE68\_1 SWAP has no hemolytic activity.** *M. marinum* M<sup>USA</sup> wild-type, *eccCb<sub>1</sub>* mutant and  
 15 *eccCb<sub>1</sub>* mutant secreting PPE68\_1 SWAP were grown in the presence or absence of Tween 80.  
 16 Subsequently, washed bacterial cells were used for the hemolysis assay.

1 **Table S1: Strains used in this study**

| Strains                                            | Characteristics                                                                                                                                                                                                                                                            | Reference  |
|----------------------------------------------------|----------------------------------------------------------------------------------------------------------------------------------------------------------------------------------------------------------------------------------------------------------------------------|------------|
| <i>E. coli</i>                                     |                                                                                                                                                                                                                                                                            |            |
| TOP10F'                                            | F'[ <i>lacI<sup>q</sup></i> , <i>Tn10</i> (TetR)] <i>mcrA</i> ( <i>mrr-hsdRMS-mcrBC</i> ) $\phi$ 80 <i>lacZ</i> $\Delta$ M15 $\Delta$ <i>lacX74 recA1 araD139 <math>\Delta</math> (<i>ara leu</i>) 7697 <i>galU galK rpsL</i> (StrR) <i>endA1 nupG</i>; Tc<sup>R</sup></i> | Invitrogen |
| <i>M. marinum</i>                                  |                                                                                                                                                                                                                                                                            |            |
| M <sup>USA</sup>                                   | Wild-type strain                                                                                                                                                                                                                                                           | 30         |
| M <sup>VU</sup>                                    | M <sup>USA</sup> with single base insertion in <i>eccCb<sub>1</sub></i> ( <i>MMAR_5446</i> )                                                                                                                                                                               | 7          |
| M <sup>VU</sup> / $\Delta$ <i>eccC<sub>5</sub></i> | M <sup>VU</sup> with unmarked <i>eccC<sub>5</sub></i> ( <i>MMAR_2665</i> ) deletion. The strain additionally contains the plasmid pSMT3:: <i>mspA</i> for viability                                                                                                        | 27         |
| $\Delta$ <i>espG<sub>1</sub></i>                   | M <sup>USA</sup> with the unmarked <i>espG<sub>1</sub></i> ( <i>MMAR_5441</i> ) deletion                                                                                                                                                                                   | This study |
| LA1                                                | M <sup>VU</sup> with mariner transposon inserted in <i>espG<sub>5</sub></i> ( <i>MMAR_2676</i> ). The strain additionally contains the plasmid pSMT3:: <i>mspA</i> for viability                                                                                           | 27         |

2  
3  
4  
5  
6  
7  
8  
9  
10



1 **Table S2: Plasmids used in this study**

| Plasmids                         | Characteristics                                                                                                                                                                                                                                            | Reference  |
|----------------------------------|------------------------------------------------------------------------------------------------------------------------------------------------------------------------------------------------------------------------------------------------------------|------------|
| pSMT3::PE31/PPE18_HA             | pSMT3 carrying in SpeI-BamHI a 1.56-Kb PCR fragment containing PE31 ( <i>MMAR_4241</i> ) and PPE18 ( <i>MMAR_4240</i> ) genes with HA-tagged C terminus, Hyg <sup>R</sup>                                                                                  | This study |
| pSMT3::PE35/PPE68_1_HA           | pSMT3 carrying in NheI-BamHI a 1.49-Kb PCR fragment containing PE35 ( <i>MMAR_0185</i> ) and PPE68_1 ( <i>MMAR_0186</i> ) genes with HA-tagged C-terminus, Hyg <sup>R</sup>                                                                                | This study |
| pSMT3::PE31/PPE18 SWAP_HA        | pSMT3 carrying in SpeI-BamHI a 1.6-Kb PCR fragment containing PE31 ( <i>MMAR_4241</i> ) gene and C-terminally tagged PPE18 ( <i>MMAR_4240</i> ) with a region of P107_W145 being replaced by PPE68_1 L106_W144, Hyg <sup>R</sup>                           | This study |
| pSMT3::PE35/PPE68_1 SWAP_HA      | pSMT3 carrying in NheI-BamHI a 1.49-Kb PCR fragment containing PE35 ( <i>MMAR_0185</i> ) gene and C-terminally tagged PPE68_1 ( <i>MMAR_0186</i> ) with a region of P107_W144 being replaced by PPE18 A108_W144, Hyg <sup>R</sup>                          | This study |
| pSMT3::PE35 SWAP/PPE68_1_HA      | pSMT3 carrying in NheI-BamHI a 1.49-Kb PCR fragment containing PE35 with a region of 15 amino acid PE31 C-terminal secretion signal and C-terminally HA-tagged PPE68_1, Hyg <sup>R</sup>                                                                   | This study |
| pSMT3::PE35 SWAP/PPE68_1 SWAP_HA | pSMT3 carrying in NheI-BamHI a 1.49-Kb PCR fragment containing PE35 swapped with a region of 15 amino acid PE31 C-terminal secretion signal and C-terminally tagged PPE68_1 with a region of P107_W144 being replaced by PPE18 A108_W144, Hyg <sup>R</sup> | This study |

|                                                                         |                                                                                                                                                                                                                                       |            |
|-------------------------------------------------------------------------|---------------------------------------------------------------------------------------------------------------------------------------------------------------------------------------------------------------------------------------|------------|
| pMV::PE35/PPE68_1_HA (Kan <sup>R</sup> )                                | pMV carrying EcoRI-HindIII a 1.49-Kb PCR fragment containing PE35 ( <i>MMAR_0185</i> ) and PPE68_1 ( <i>MMAR_0186</i> ) genes with HA-tagged C-terminus, Kan <sup>R</sup>                                                             | This study |
| pMV::PE35/PPE68_1 SWAP_HA (Kan <sup>R</sup> )                           | pMV carrying EcoRI-HindIII a 1.49-Kb PCR fragment containing PE35 ( <i>MMAR_0185</i> ) and a C-terminally HA-tagged PPE68_1 ( <i>MMAR_0186</i> ) genes with a region of P107_W144 being replaced by PPE18 A108_W144, Kan <sup>R</sup> | This study |
| pMV::PE35/PPE68_1_HA (Strep <sup>R</sup> )                              | pMV carrying PE35 ( <i>MMAR_0185</i> ) and PPE68_1 ( <i>MMAR_0186</i> ) genes with HA-tagged C-terminus, Strep <sup>R</sup>                                                                                                           | This study |
| pMV::PE35/PPE68_1 SWAP_HA (Strep <sup>R</sup> )                         | pMV carrying PE35 ( <i>MMAR_0185</i> ) and PPE68_1 ( <i>MMAR_0186</i> ) genes with HA-tagged C-terminus with a region of P107_W144 being replaced by PPE18 A108_W144, Strep <sup>R</sup>                                              | This study |
| pSMT3::PE35/PPE68_1 L125E                                               | pSMT3::PE35/PPE68_1 in which leucine-125 has been mutated into a glutamine, Hyg <sup>R</sup>                                                                                                                                          | This study |
| pSMT3::PE35/PPE68_1 L125A                                               | pSMT3::PE35/PPE68_1 in which leucine-125 has been mutated into an alanine, Hyg <sup>R</sup>                                                                                                                                           | This study |
| pMV:: <i>espG<sub>1</sub>/espH/eccA<sub>1</sub></i> (Kan <sup>R</sup> ) | pMV carrying PacI-HindIII an <i>espG<sub>1</sub>/espH/eccA<sub>1</sub></i> ( <i>MMAR_5441/MMAR_5442 /MMAR_5443</i> ), Kan <sup>R</sup>                                                                                                | This study |
| pMV:: <i>esxM/esxN/espG<sub>5</sub></i> (Strep <sup>R</sup> )           | pMV carrying XmnI-HindII an <i>M. marinum</i> <i>esxM/esxN/espG<sub>5</sub></i> , Strep <sup>R</sup>                                                                                                                                  | This study |

1

2

3

4

1 **Table S3: Primers used in this study**

| Plasmids                                          | Primer name                                                                | Primer sequence                                                                                                                                           | Restriction site |
|---------------------------------------------------|----------------------------------------------------------------------------|-----------------------------------------------------------------------------------------------------------------------------------------------------------|------------------|
| pSMT3::PE31/PPE18_HA                              | PE31-SPEI-F<br>PPE18-HA-BAMHI-R                                            | CCCACTAGTGTCTTCTGTTACGGCTC<br>CCCGGATCCTCACGCGTAGTCCGGCACGTCGTAC<br>GGGTA TCCC GCGGCTGGAGGG                                                               | SpeI<br>BamHI    |
| pSMT3::PE35/PPE68_1_HA                            | PE35-NHEI-F<br>PPE68_1-HA-BAMHI-R                                          | CCCGCTACG ATGCGATCCATGTCTTTTGA<br>CCCGGATCCTCACGCGTAGTCCGGCACGTCGTAC<br>GGGTA CCAGTCGTCTGTCATCC                                                           | NheI<br>BamHI    |
| pSMT3::PE35/PPE68_1 L125R_HA                      | PPE68_1 L125R-F<br>PPE68_1 L125R-R                                         | GACCAATTTCCGAGGCATCAACA<br>TGTTGATGCCTCGGAAATTGGTC                                                                                                        |                  |
| pSMT3::PE35/PPE68_1 L125A_HA                      | PPE68_1 125A-F<br>PPE68_1 125A-R                                           | GACCAATTTCCGCCGCATCAACAC<br>GTGTTGATGCGGCGGAAATTGGTC                                                                                                      |                  |
| pSMT3::PE35/PPE68_1 SWAP_HA                       | PPE18 A108_W144_Fw<br>PPE18 A108_W144_Rv<br>PPE68_L106_Rv<br>PPE68 N145_Fw | CCTTGGCGATGACGCCGTCGCTGGCGTTGATCCTC<br>GAAAACC<br>CATCGCGCTGGCGGCTGGTTCCACATCTCGCCGT<br>ACTCAG<br>GGATCAACGCCAGCGACGGCGTCATC<br>CGAGATGTGGAACCAGGCCGCCAGC | NheI<br>BamHI    |
| pSMT3::PE35 SWAP/PPE68_1_HA                       | PE35_PE31(15C) ss_Fw<br>PE35_PE31(15C) ss_Rv                               | GAAACCGCCAACGCCGTGGCATCTCAA<br>TAGTCGGCCTGCCAAC<br>TTGAGATGCCACGGCGTTGGCGGTTTCGGTGCTC<br>AGGTACGAGGCCGCGATCTGCCGC                                         | NheI<br>BamHI    |
| pMV::PE35/PPE68_1_HA<br>pMV::PE35_PPE68_1 SWAP_HA | PE35_EcoRI_F<br>PPE68_1_HA_HindIII_R                                       | GGGGGGAATTCATGCGATCCATGTCTTTTG<br>GGGGGGAAGCTTTCACGCGTAGTCCGGC                                                                                            | EcoRI<br>HindIII |
| pSMT3::PE31/PPE18 SWAP PPE68_HA                   | PPE68 P107_W144_Fw<br>PPE68 P107_W144_Rv<br>PPE18_M1_P106_Rv               | ACGGTGCCCCCG CCCGAGATCGCCG<br>GGCGTCTGGGCCACATTCCGGATGAAATA<br>GTC CGGCGATCTCGGGCGGGGGCACCGT                                                              |                  |

|                                                    |                                                                                                            |                                                                                                                                                                                            |                 |
|----------------------------------------------------|------------------------------------------------------------------------------------------------------------|--------------------------------------------------------------------------------------------------------------------------------------------------------------------------------------------|-----------------|
|                                                    | PPE18_A146_Fw                                                                                              | GACTATTTTCATCCGAATGTGGGCCAGGACGCC                                                                                                                                                          |                 |
| $\Delta espG_1$                                    | EspG <sub>1</sub> KO LF                                                                                    | TTTTTTTTCCATAAATTGGTTCGAATCAGGCCGAA<br>TATG                                                                                                                                                |                 |
|                                                    | EspG <sub>1</sub> KO LR                                                                                    | TTTTTTTTCCATTTCTTGGATCAGCCAAAAATCTTG<br>TC                                                                                                                                                 |                 |
|                                                    | EspG <sub>1</sub> KO RF                                                                                    | TTTTTTTTCCATAGATTGGAGTCTGCTCGAACTACT<br>TCC                                                                                                                                                |                 |
|                                                    | EspG <sub>1</sub> KO RR                                                                                    | TTTTTTTTCCATCTTTTGGTTGAGCCACGACACCAG<br>ATG                                                                                                                                                |                 |
| pMV:: <i>espG<sub>1</sub>/espH/ecA<sub>1</sub></i> | Fw_Pacl_EspG <sub>1</sub><br>Rv_EccA <sub>1</sub> _HindIII                                                 | GGGGGGTTAATTAATGACCGGTCCGCTCG<br>GGGGGGAAGCTTTCACTCTCTCATATTGAGGTGT<br>G                                                                                                                   | Pacl<br>HindIII |
| pMV:: <i>esxM-esxN-espG<sub>5</sub></i>            | EsxMmar_XmnI_F<br>EspG <sub>5</sub> mar_HindIII_R                                                          | GACTGAAAGAATTCCATATGACTGCACGCTTT<br>ATGACC<br>GACTAAGCTTTCAAACCTCTGCTATGCGTTTTTC                                                                                                           | Xmnl<br>HindIII |
| Quantitative PCR                                   | SigA-Fw<br>SigA-Rv<br>esxA1_Fw<br>esxA1_Rv<br>esxA2 qPCR F<br>esxA2 qPCR R<br>esxA3 qPCR F<br>esxA3 qPCR R | GAAAAACCACTGCTGGAAG<br>CGCGTAGGTGGAGAACTTGT<br>CACCAGCATTCAATCCCTTC<br>AGGTTCTGCAGCGAGTTGTT<br>ATTCGGCCTTCTGCTTGTGG<br>TTCGGCCTTCTGCTTGTGG<br>GCATCCAGCGCAATTCAGGG<br>GCGAGTTGTTGAGCTCCTGC |                 |

1

2

3
